# Supplementary material for: Variation in xenobiotic transport and metabolism genes, household chemical exposures, and risk of childhood acute lymphoblastic leukemia
Source: Springer Nature journal article supplement (doi:10.1007/s10552-012-9947-4), 2012-06-06
Supplement: MOESM1 [file 8851038]

Supplementary Figure 1. Haplotype sliding window analyses for xenobiotic transport and metabolism genes with significant haplotype results (p≤0.05)

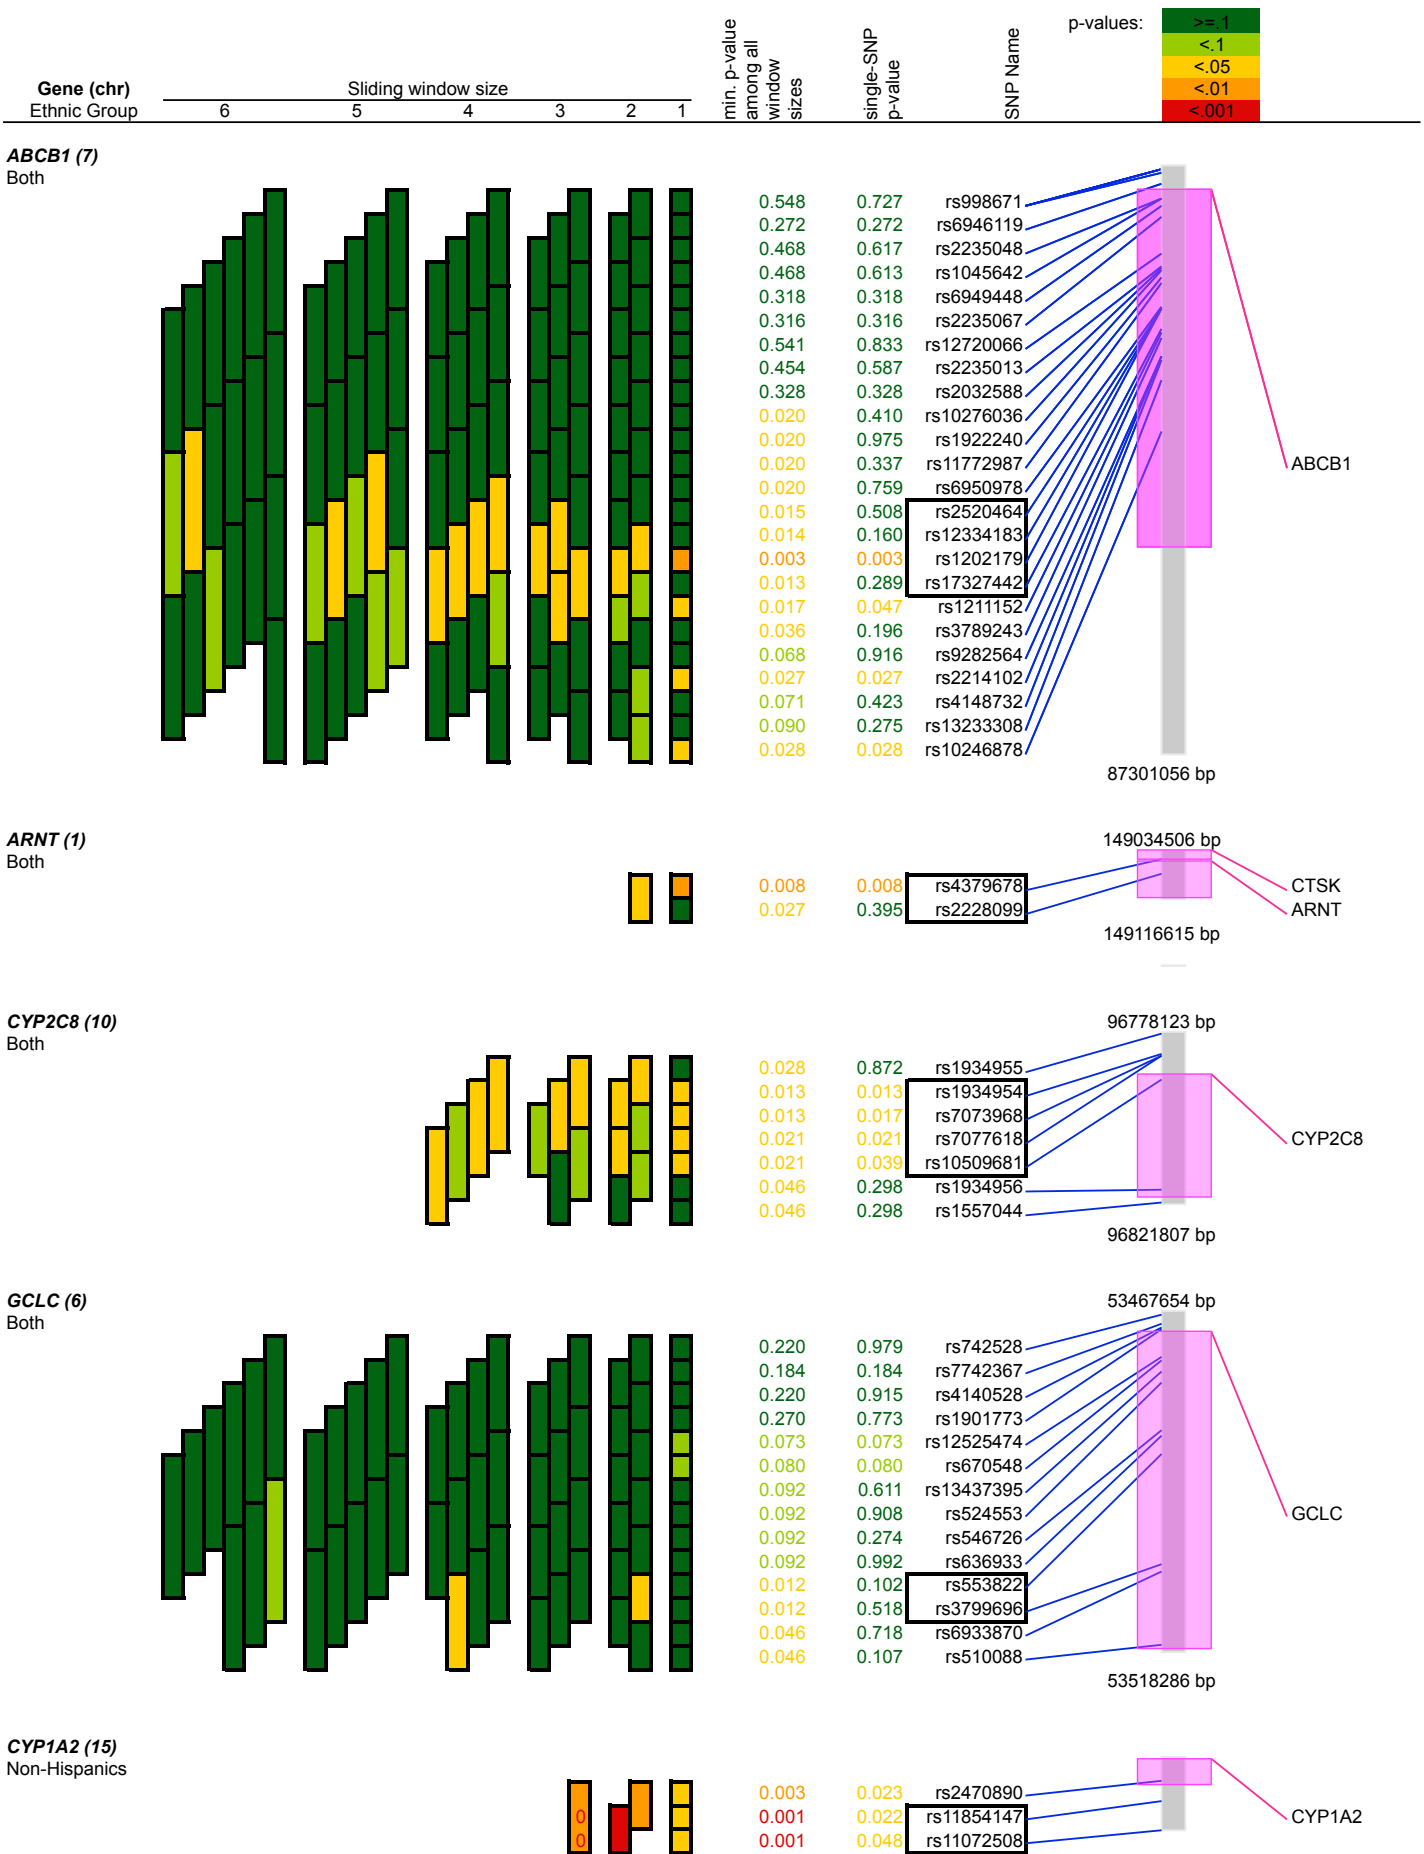

**CYP1B1 (2)**  
Non-Hispanics

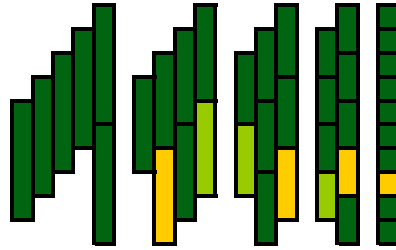

|       |       |           |
|-------|-------|-----------|
| 0.725 | 0.976 | rs163078  |
| 0.607 | 0.737 | rs2256327 |
| 0.230 | 0.230 | rs2855658 |
| 0.189 | 0.679 | rs10916   |
| 0.059 | 0.177 | rs1056836 |
| 0.059 | 0.777 | rs2617266 |
| 0.011 | 0.435 | rs162557  |
| 0.011 | 0.044 | rs162556  |
| 0.016 | 0.436 | rs162555  |
| 0.026 | 0.236 | rs9309022 |

72849662 bp

38029604 bp

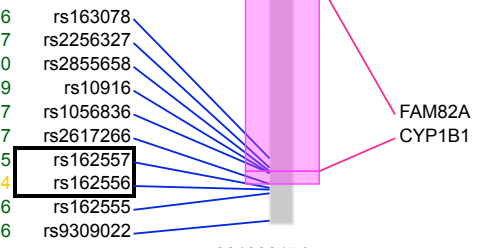

38183215 bp

**CYP2B6 (19)**  
Non-Hispanics

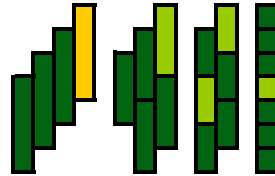

|       |       |            |
|-------|-------|------------|
| 0.037 | 0.415 | rs3760657  |
| 0.037 | 0.123 | rs2054675  |
| 0.037 | 0.212 | rs8100458  |
| 0.037 | 0.062 | rs3745274  |
| 0.098 | 0.231 | rs707265   |
| 0.146 | 0.516 | rs7249735  |
| 0.224 | 0.593 | rs10425769 |

46104785 bp

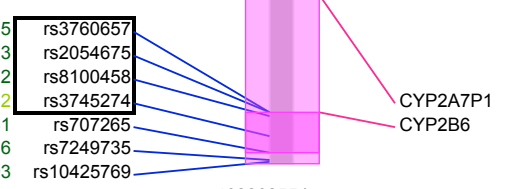

46226255 bp

**IDH1 (2)**  
Hispanics

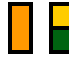

|       |       |           |
|-------|-------|-----------|
| 0.008 | 0.022 | rs1992739 |
| 0.008 | 0.112 | rs4290589 |

208799247 bp

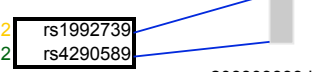

208803833 bp
