# Supplementary material for: Variation in xenobiotic transport and metabolism genes, household chemical exposures, and risk of childhood acute lymphoblastic leukemia
Source: Springer Nature journal article supplement (doi:10.1007/s10552-012-9947-4), 2012-06-06
Supplement: MOESM2 [file 8851038]

**Supplementary Table A. Xenobiotic transport and metabolism genes and single nucleotide polymorphisms (SNPs) typed**

| Gene symbol         | Gene name                                                                               | Chromosome | N total haplotype tagging SNPs typed |
|---------------------|-----------------------------------------------------------------------------------------|------------|--------------------------------------|
| <i>ABCB1 (MDR1)</i> | ATP-binding cassette, sub-family B (MDR/TAP), member 1                                  | 07         | 24                                   |
| <i>ABCC1 (MRP1)</i> | ATP-binding cassette, sub-family C (CFTR/MRP), member 1                                 | 16         | 39                                   |
| <i>ABCC2 (MRP2)</i> | ATP-binding cassette, sub-family C (CFTR/MRP), member 2                                 | 10         | 8                                    |
| <i>AHR</i>          | aryl hydrocarbon receptor                                                               | 07         | 1                                    |
| <i>ARNT</i>         | aryl hydrocarbon receptor nuclear translocator                                          | 01         | 2                                    |
| <i>COMT</i>         | catechol-O-methyltransferase                                                            | 22         | 5                                    |
| <i>CYP1A1</i>       | cytochrome P450, family 1, subfamily A, polypeptide 1                                   | 15         | 6                                    |
| <i>CYP1A2</i>       | cytochrome P450, family 1, subfamily A, polypeptide 2                                   | 15         | 3                                    |
| <i>CYP1B1</i>       | cytochrome P450, family 1, subfamily B, polypeptide 1                                   | 02         | 10                                   |
| <i>CYP2A6</i>       | cytochrome P450, family 2, subfamily A, polypeptide 6                                   | 19         | 1                                    |
| <i>CYP2B6</i>       | cytochrome P450, family 2, subfamily B, polypeptide 6                                   | 19         | 7                                    |
| <i>CYP2C19</i>      | cytochrome P450, family 2, subfamily C, polypeptide 19                                  | 10         | 4                                    |
| <i>CYP2C8</i>       | cytochrome P450, family 2, subfamily C, polypeptide 8                                   | 10         | 7                                    |
| <i>CYP2D6</i>       | cytochrome P450, family 2, subfamily D, polypeptide 6                                   | 22         | 3                                    |
| <i>CYP2E1</i>       | cytochrome P450, family 2, subfamily E, polypeptide 1                                   | 10         | 5                                    |
| <i>CYP3A4</i>       | cytochrome P450, family 3, subfamily A, polypeptide 4                                   | 07         | 2                                    |
| <i>CYP3A5</i>       | cytochrome P450, family 3, subfamily A, polypeptide 5                                   | 07         | 3                                    |
| <i>EPHX1</i>        | epoxide hydrolase 1, microsomal (xenobiotic)                                            | 01         | 4                                    |
| <i>EPHX2</i>        | epoxide hydrolase 2, cytoplasmic                                                        | 08         | 7                                    |
| <i>FMO3</i>         | flavin containing monooxygenase 3                                                       | 01         | 6                                    |
| <i>GCLC</i>         | glutamate-cysteine ligase, catalytic subunit                                            | 06         | 14                                   |
| <i>GGT1</i>         | gamma-glutamyltransferase 1                                                             | 22         | 1                                    |
| <i>GPX6</i>         | glutathione peroxidase 6 (olfactory)                                                    | 06         | 4                                    |
| <i>GSR</i>          | glutathione reductase                                                                   | 08         | 5                                    |
| <i>GSS</i>          | glutathione synthetase                                                                  | 20         | 5                                    |
| <i>GSTA1</i>        | glutathione S-transferase A1                                                            | 06         | 2                                    |
| <i>GSTO2</i>        | glutathione S-transferase omega 2                                                       | 10         | 3                                    |
| <i>GSTP1</i>        | glutathione S-transferase pi                                                            | 11         | 1                                    |
| <i>IDH1</i>         | isocitrate dehydrogenase 1 (NADP+), soluble                                             | 02         | 2                                    |
| <i>MPO</i>          | myeloperoxidase                                                                         | 17         | 3                                    |
| <i>NAT1</i>         | N-acetyltransferase 1 (arylamine N-acetyltransferase)                                   | 08         | 6                                    |
| <i>NAT2</i>         | N-acetyltransferase 2 (arylamine N-acetyltransferase)                                   | 08         | 11                                   |
| <i>NQO1</i>         | NAD(P)H dehydrogenase, quinone 1                                                        | 16         | 4                                    |
| <i>PON1</i>         | paraoxonase 1                                                                           | 07         | 11                                   |
| <i>PTGS1 (COX1)</i> | prostaglandin-endoperoxide synthase 1 (prostaglandin G/H synthase and cyclooxygenase 1) | 09         | 2                                    |
| <i>PTGS2 (COX2)</i> | prostaglandin-endoperoxide synthase 2 (prostaglandin G/H synthase and cyclooxygenase 2) | 01         | 4                                    |
| <i>SULT1A1</i>      | sulfotransferase family, cytosolic, 1A, phenol-preferring, member 1                     | 16         | 2                                    |
| <i>TPMT</i>         | thiopurine S-methyltransferase                                                          | 06         | 4                                    |
| <i>UGT1A1</i>       | UDP glucuronosyltransferase 1 family, polypeptide A1                                    | 02         | 6                                    |
| <i>UGT1A7</i>       | UDP glucuronosyltransferase 1 family, polypeptide A7                                    | 02         | 5                                    |
| <i>UGT1A9</i>       | UDP glucuronosyltransferase 1 family, polypeptide A9                                    | 02         | 4                                    |
| <i>UGT2B7</i>       | UDP glucuronosyltransferase 2 family, polypeptide B7                                    | 04         | 4                                    |
